# Supplementary material
Source: Elsevier journal article supplement (https://www.sciencedirect.com/science/article/pii/S0211699518300456)
Supplement: mmc1 [file S0211699518300456:mmc1.docx]

Material suplementario para

**Predicción precoz de la insuficiencia renal aguda, asociada a la cirugía cardiaca: la tasa de filtrado glomerular estimada como biomarcador alternativo**

Angel M, Candela-Toha, María Carmen Pardo, Teresa Pérez, Alfonso Muriel y Javier Zamora

**Índice:**

**Figuras A1.1-A1.2-A1.3:**

Figura A1.1. Curvas ROC tiempo-dependientes (acumulada/dinámica) para IRAI grave (estadio III) frente a control, en la muestra exploratoria. La línea sólida corresponde a la predicción para un día y la línea punteada corresponde a la predicción con dos días de antelación para el cambio en MDRD-4 (MDRD-4) desde basal.

Figura A1.2. Curvas ROC tiempo-dependientes (acumulada/dinámica) para IRA grave (estadio III) frente a control, en la muestra exploratoria. La línea sólida corresponde a la predicción para un día y la línea punteada corresponde a la predicción con dos días de antelación para urea.

Figura A1.3. Curvas ROC tiempo-dependientes (acumulada/dinámica) para IRA grave (estadio III) frente a control, en la muestra exploratoria. La línea sólida corresponde a la predicción para un día y la línea punteada corresponde a la predicción con dos días de antelación para el cambio en urea (Urea) desde basal.

**Figuras A2.1-A2.2-A2.3:**

Figura A2.1. Curvas ROC tiempo-dependientes (acumulada/dinámica) para IRA moderada (estadio II) frente a control, en la muestra exploratoria. La línea sólida corresponde a la predicción para un día y la línea punteada corresponde a la predicción con dos días de antelación para el cambio en MDRD-4 (MDRD-4) desde basal.

Figura A2.2. Curvas ROC tiempo-dependientes (acumulada/dinámica) para IRA moderada (estadio II) frente a control, en la muestra exploratoria. La línea sólida corresponde a la predicción para un día y la línea punteada corresponde a la predicción con dos días de antelación para urea.

Figura A2.3. Curvas ROC tiempo-dependientes (acumulada/dinámica) para IRA moderada (estadio II) frente a control, en la muestra exploratoria. La línea sólida corresponde a la predicción para un día y la línea punteada corresponde a la predicción con dos días de antelación para el cambio en urea (Urea) desde basal.

**Figuras A3.1-A3.2-A3.3:**

Figura A3.1. Curvas ROC tiempo-dependientes (acumulada/dinámica) para IRA leve (estadio I) frente a control, en la muestra exploratoria. La línea sólida corresponde a la predicción para un día y la línea punteada corresponde a la predicción con dos días de antelación para el cambio en MDRD-4 (MDRD-4) desde basal.

Figura A3.2. Curvas ROC tiempo-dependientes (acumulada/dinámica) para IRA leve (estadio I) frente a control, en la muestra exploratoria. La línea sólida corresponde a la predicción para un día y la línea punteada corresponde a la predicción con dos días de antelación para urea.

Figura A3.3. Curvas ROC tiempo-dependientes (acumulada/dinámica) para IRA leve (estadio I) frente a control, en la muestra exploratoria. La línea sólida corresponde a la predicción para un día y la línea punteada corresponde a la predicción con dos días de antelación para el cambio en urea (Urea) desde basal.

**Tablas A1-A2-A3-A4:**

Tabla A.1. AUCs de las curvas ROC tiempo-dependientes (acumulada/dinámica) para el cambio en MDRD4 desde basal, en la muestra exploratoria.

Tabla A.2. AUCs de las curvas ROC tiempo-dependientes (acumulada/dinámica) para urea, en la muestra exploratoria.

Tabla A.3. AUCs de las curvas ROC tiempo-dependientes (acumulada/dinámica) para el cambio en urea desde basal, en la muestra exploratoria.

Tabla A.4. AUCs de las curvas ROC tiempo-dependientes (acumulada/dinámica) para el cambio en Crs desde basal, en la muestra exploratoria.

Figura A1.1. Curvas ROC tiempo-dependientes (acumulada/dinámica) para IRA grave (estadio III) frente a control, en la muestra exploratoria. La línea sólida corresponde a la predicción para un día y la línea punteada corresponde a la predicción con dos días de antelación para el cambio en MDRD-4 desde basal.

| MDRD-4 se mide |
| --- |
| 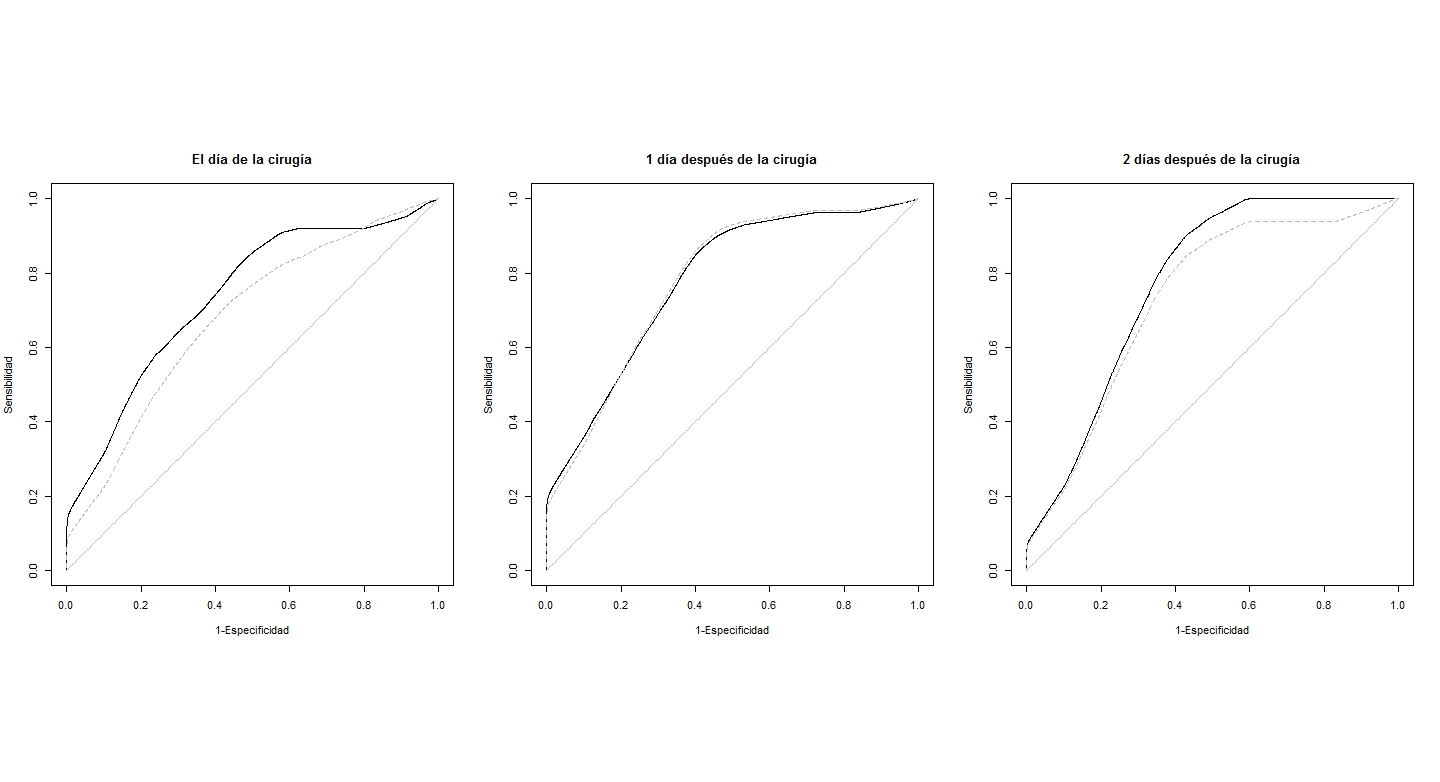 |

Figura A1.2. Curvas ROC tiempo-dependientes (acumulada/dinámica) para IRA grave (estadio III) frente a control, en la muestra exploratoria. La línea sólida corresponde a la predicción para un día y la línea punteada corresponde a la predicción con dos días de antelación para urea.

| La urea se mide |
| --- |
| 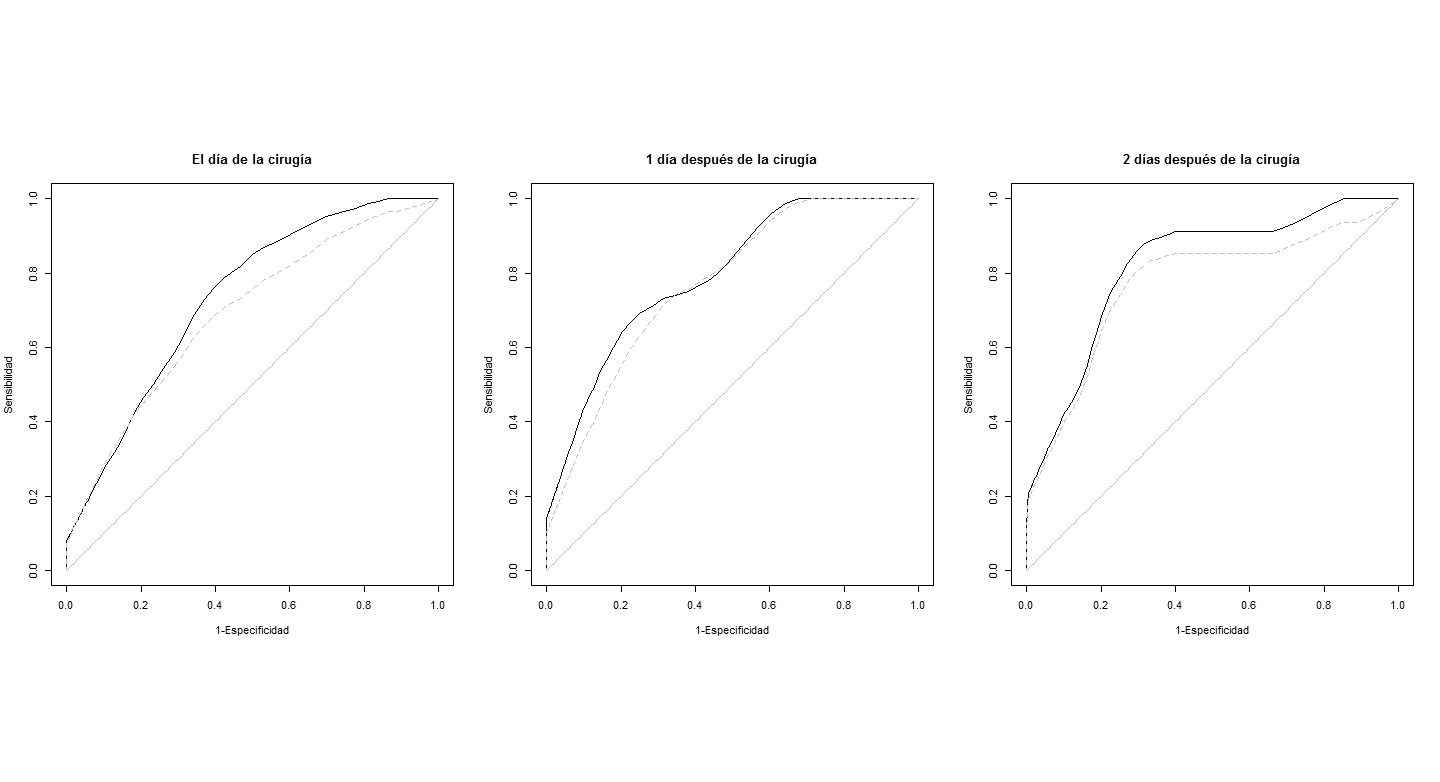 |

Figura A1.3. Curvas ROC tiempo-dependientes (acumulada/dinámica) para IRA grave (estadio III) frente a control, en la muestra exploratoria. La línea sólida corresponde a la predicción para un día y la línea punteada corresponde a la predicción con dos días de antelación para el cambio en urea desde basal.

| Urea se mide |
| --- |
| 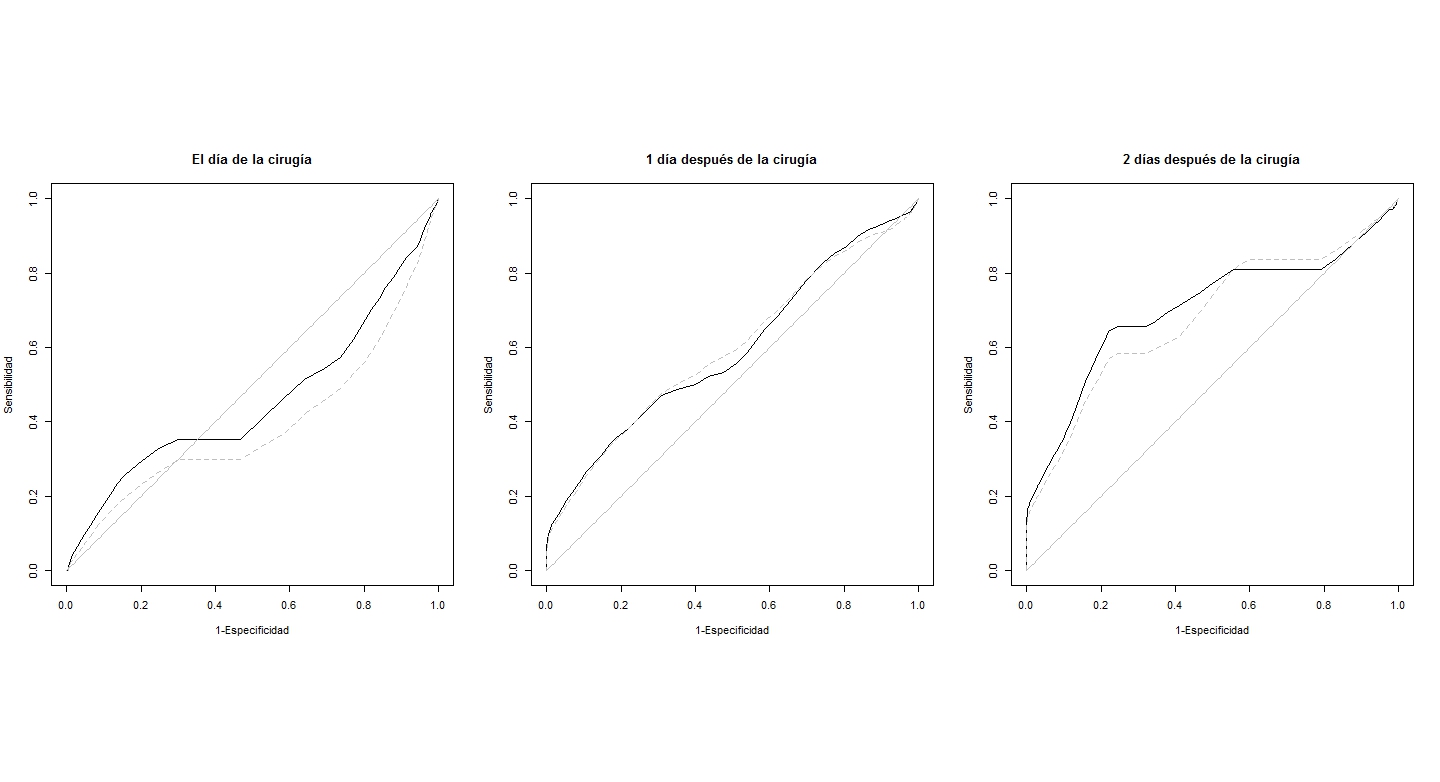 |

Figura A2.1. Curvas ROC tiempo-dependientes (acumulada/dinámica) para IRA moderada (estadio II) frente a control, en la muestra exploratoria. La línea sólida corresponde a la predicción para un día y la línea punteada corresponde a la predicción con dos días de antelación para el cambio en MDRD-4 desde basal.

| MDRD-4 se mide |
| --- |
| 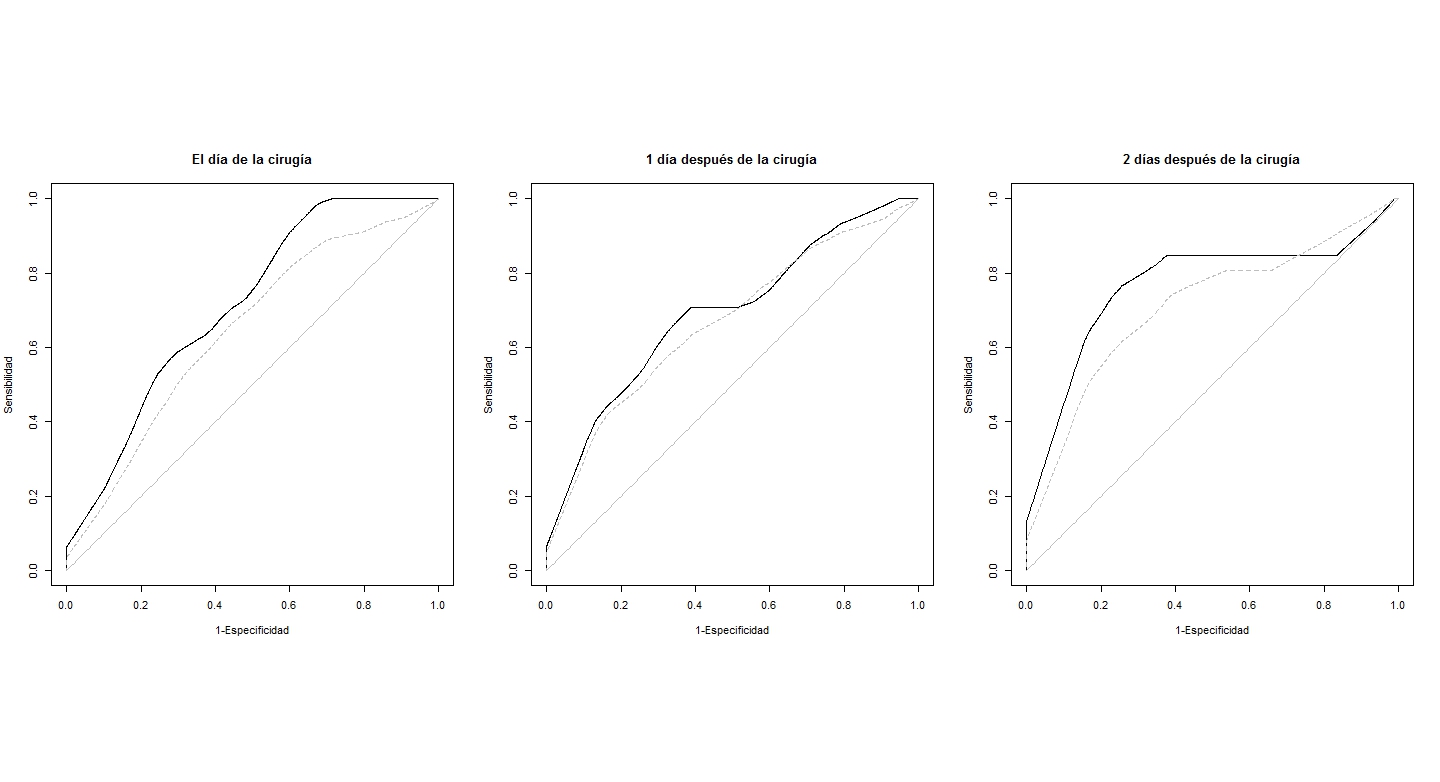 |

Figura A2.2. Curvas ROC tiempo-dependientes (acumulada/dinámica) para IRA moderada (estadio II) frente a control, en la muestra exploratoria. La línea sólida corresponde a la predicción para un día y la línea punteada corresponde a la predicción con dos días de antelación para la urea.

| La urea se mide |
| --- |
| 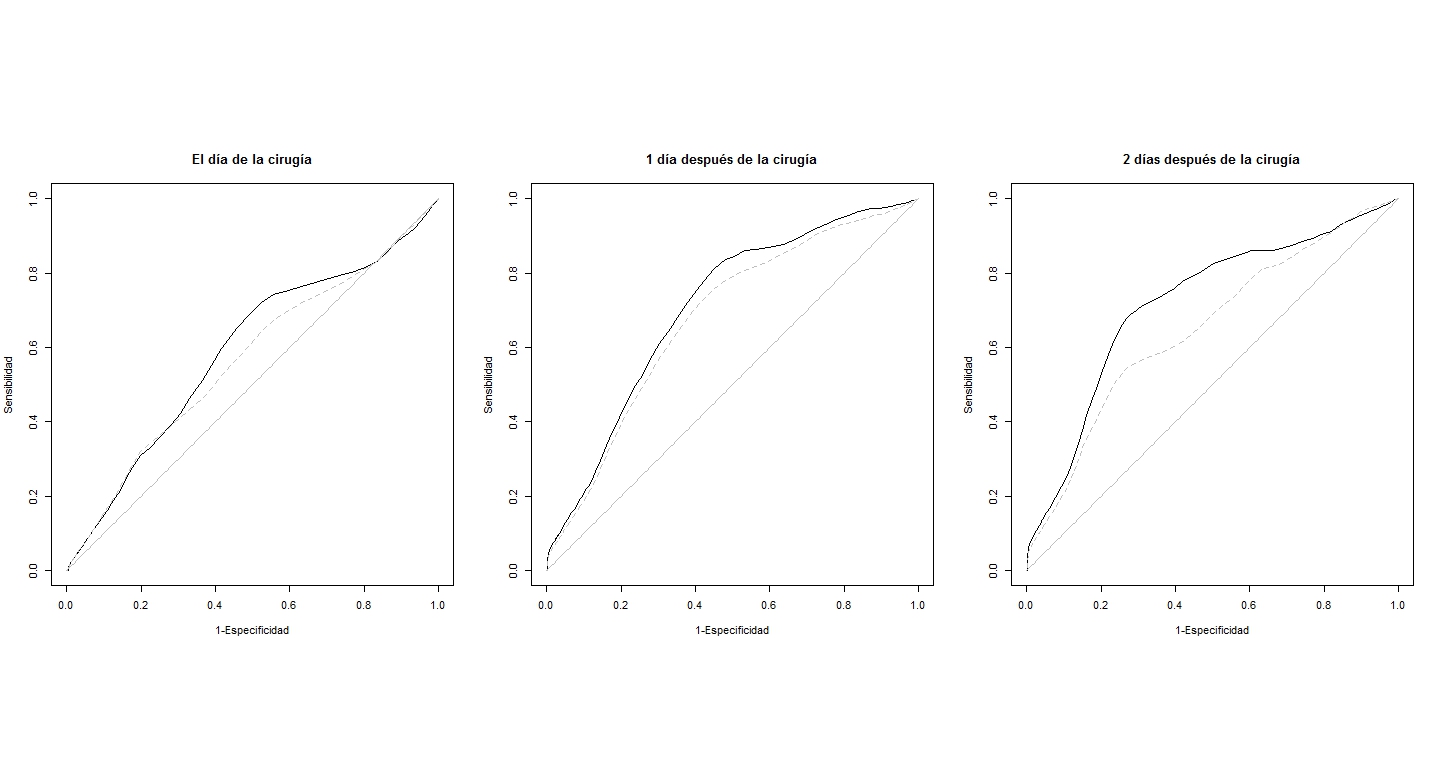 |

Figura A2.3. Curvas ROC tiempo-dependientes (acumulada/dinámica) para IRA moderada (estadio II) frente a control, en la muestra exploratoria. La línea sólida corresponde a la predicción para un día y la línea punteada corresponde a la predicción con dos días de antelación para el cambio en urea desde basal.

| Urea se mide |
| --- |
| 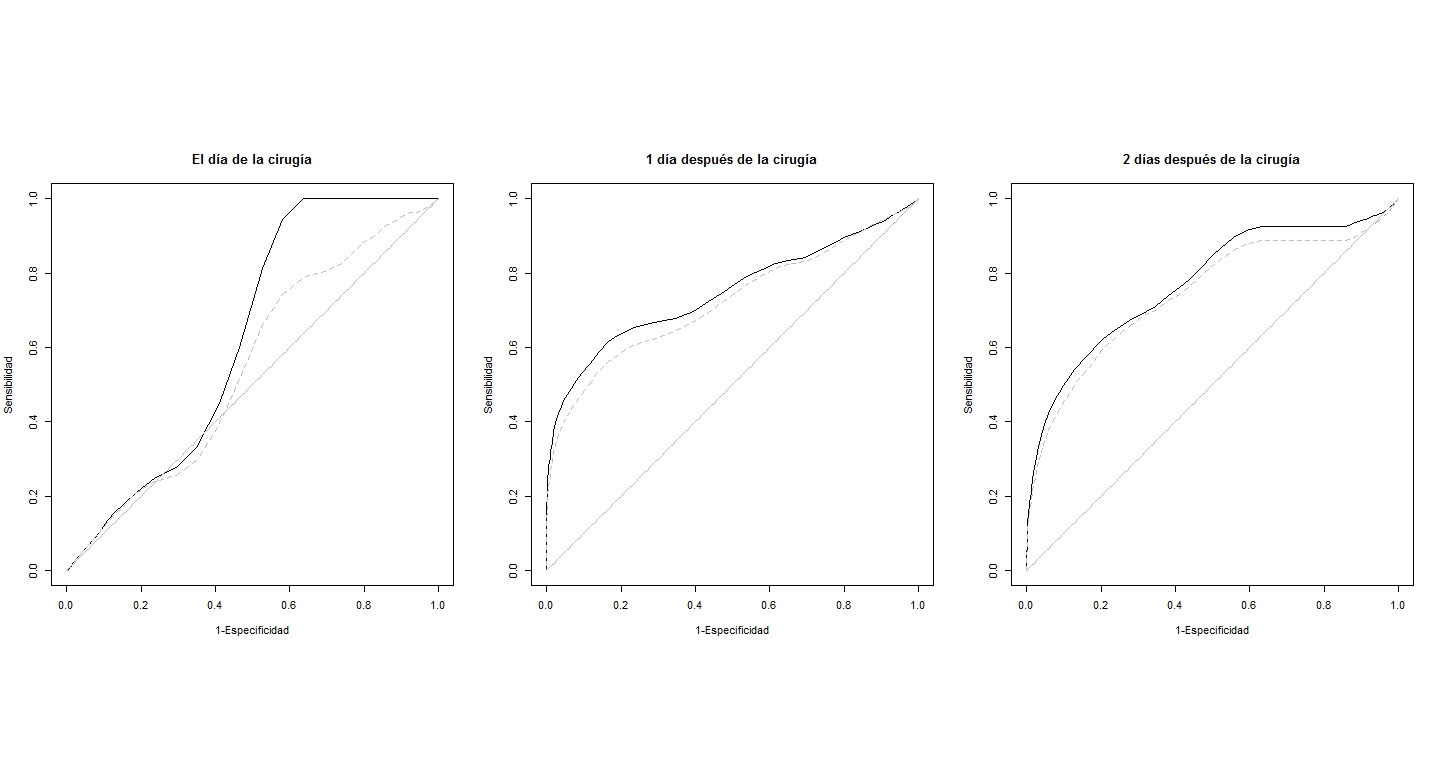 |

Figura A3.1. Curvas ROC tiempo-dependientes (acumulada/dinámica) para IRA leve (estadio I) frente a control, en la muestra exploratoria. La línea sólida corresponde a la predicción para un día y la línea punteada corresponde a la predicción con dos días de antelación para el cambio en MDRD-4 desde basal.

| MDRD-4 se mide |
| --- |
| 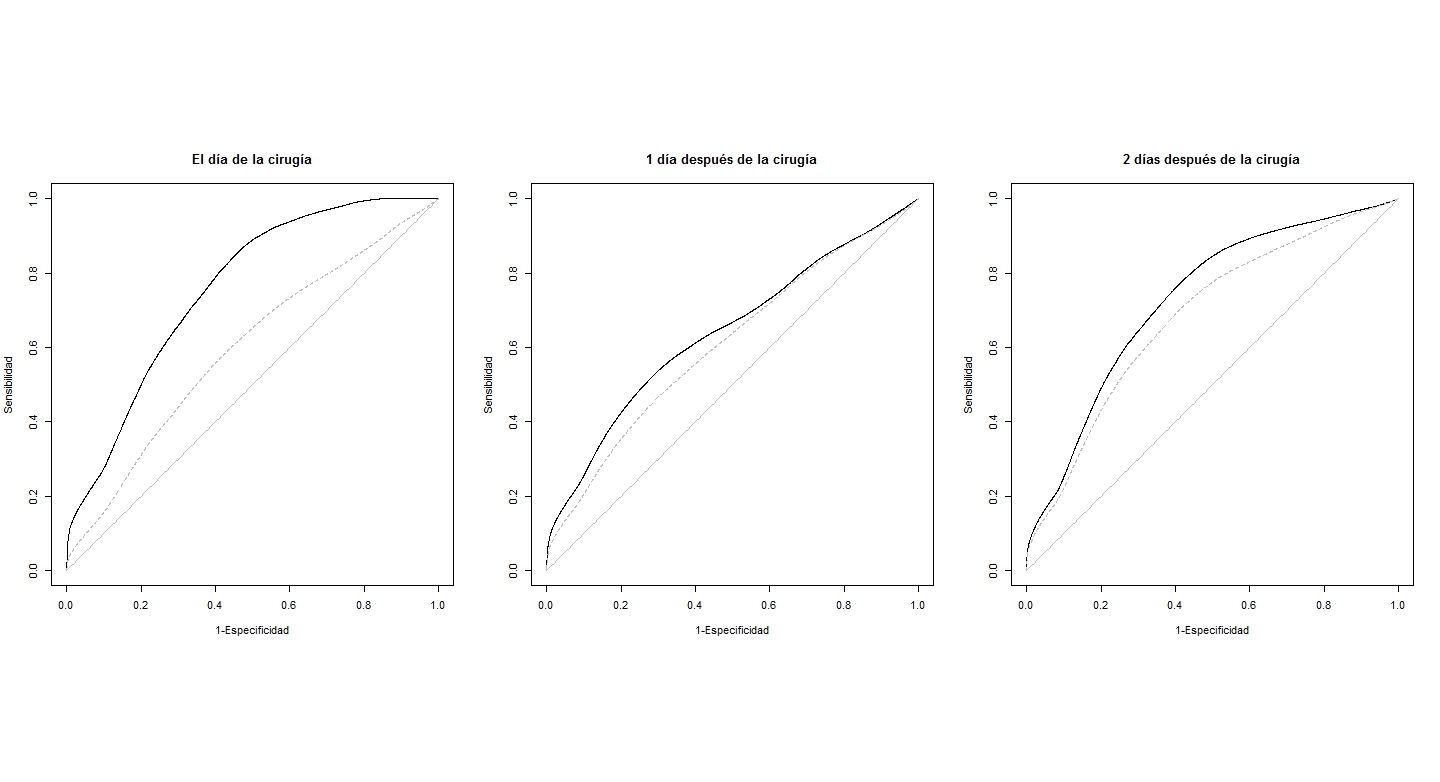 |

Figura A3.2. Curvas ROC tiempo-dependientes (acumulada/dinámica) para IRA leve (estadio I) frente a control, en la muestra exploratoria. La línea sólida corresponde a la predicción para un día y la línea punteada corresponde a la predicción con dos días de antelación para urea.

| La urea se mide |
| --- |
| 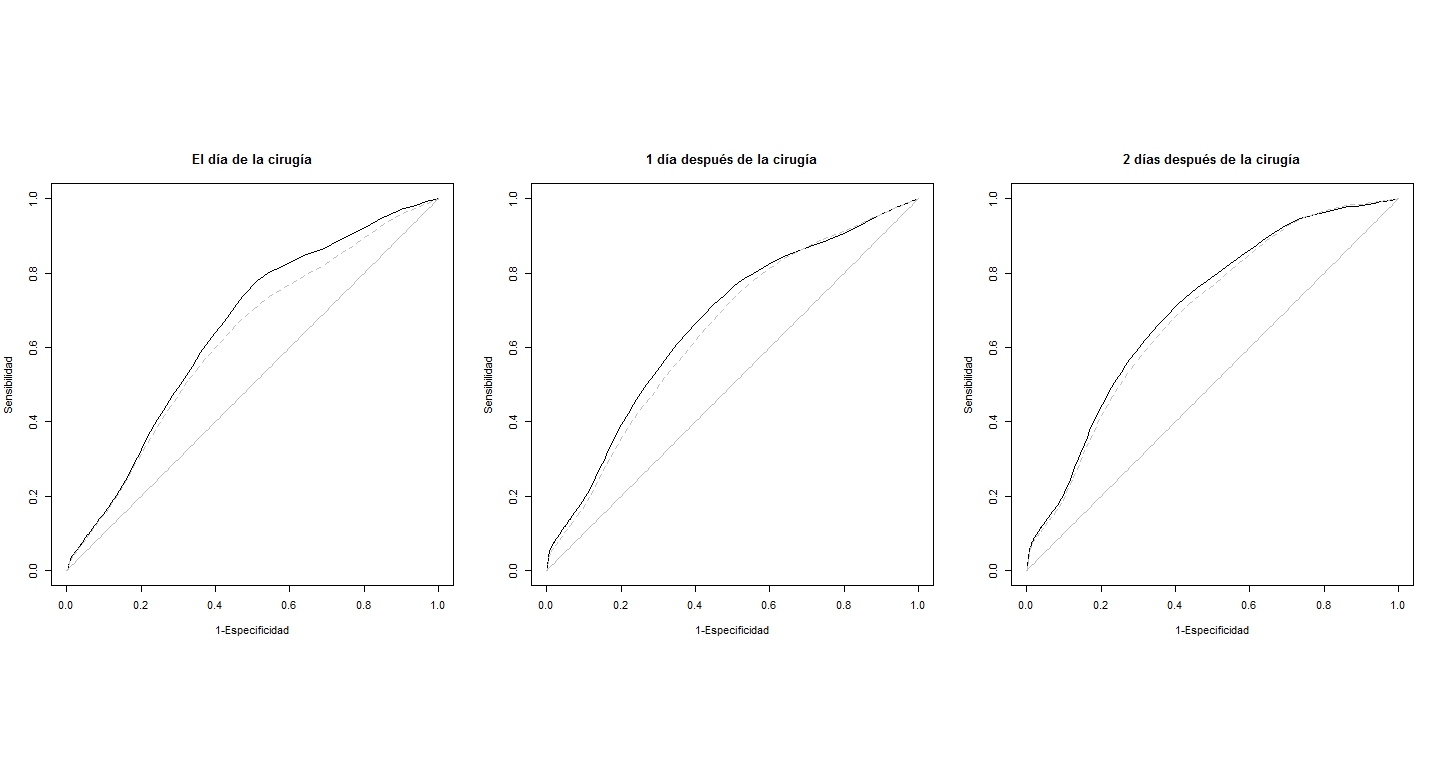 |

Figura A3.3 Curvas ROC tiempo-dependientes (acumulada/dinámica) para IRA leve (estadio I) frente a control, en la muestra exploratoria. La línea sólida corresponde a la predicción para un día y la línea punteada corresponde a la predicción con dos días de antelación para el cambio en urea desde basal.

| Urea se mide |
| --- |
| 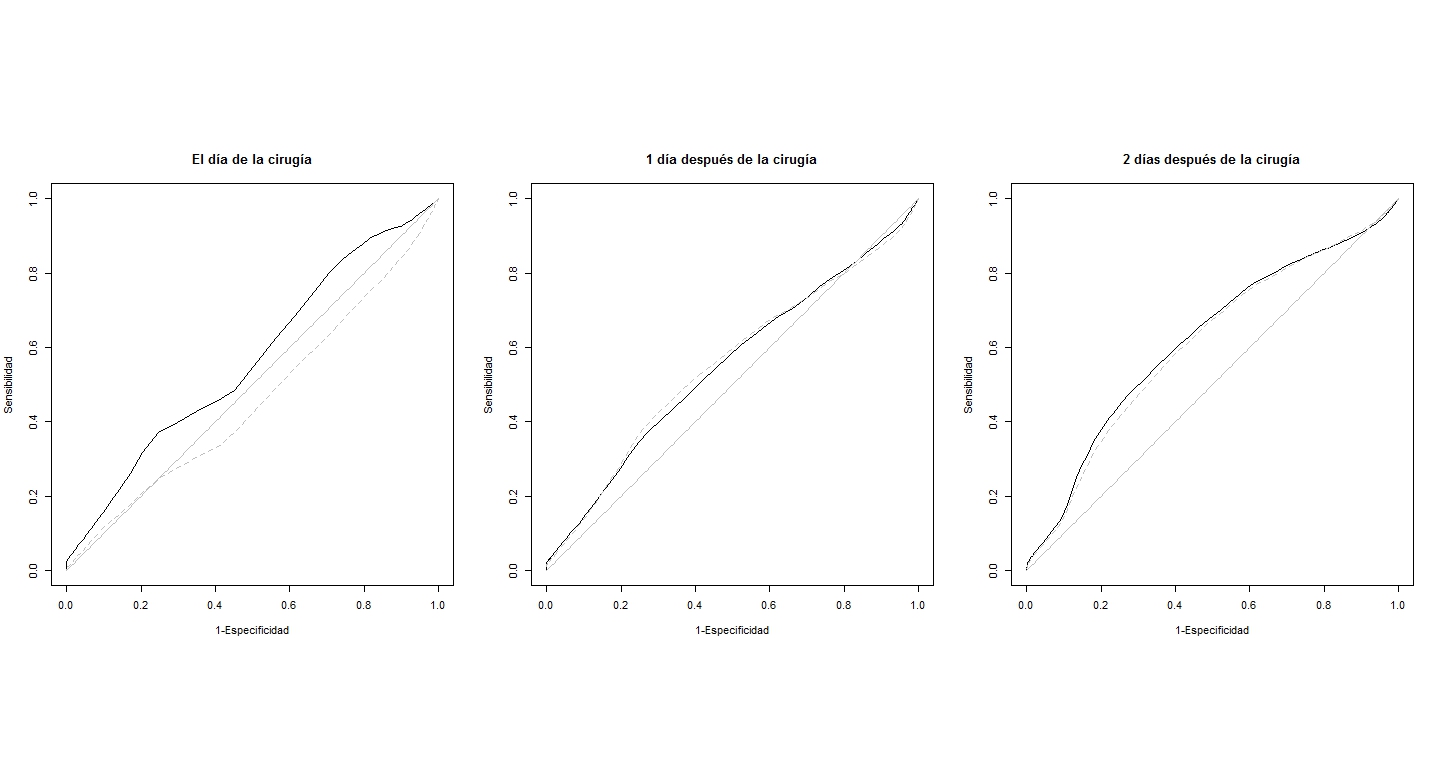 |

Tabla A.1. AUCs de las curvas ROC tiempo-dependientes (acumulada/dinámica) para el cambio en MDRD4 desde basal, en la muestra exploratoria.

| **El cambio en MDRD-4 se mide** |  |  |  | **Tipo** | | | | |
| --- | --- | --- | --- | --- | --- | --- | --- | --- |
|  | **ta** |  | **GRAVE - III** |  | **MODERADO - II** |  | **LEVE - I** |
| **El día de la cirugía** |  | t=1 |  | 0.736 |  | 0.710 |  | 0.758 |
|  | t=2 |  | 0.680 |  | 0.643 |  | 0.596 |
| **1 día después de la cirugía** |  | t=1 |  | 0.779 |  | 0.691 |  | 0.640 |
|  | t=2 |  | 0.782 |  | 0.666 |  | 0.608 |
| **1 día después de la cirugía** |  | t=1 |  | 0.773 |  | 0.766 |  | 0.727 |
|  | t=2 |  | 0.731 |  | 0.710 |  | 0.683 |

a t es el intervalo de tiempo, en días, entre la medición del biomarcador y el diagnóstico clínico del episodio de IRA.

Tabla A.2. AUCs de las curvas ROC tiempo-dependientes (acumulada/dinámica) para urea, en la muestra exploratoria.

|  |  |  |  | **Tipo** | | | | |
| --- | --- | --- | --- | --- | --- | --- | --- | --- |
| **La urea se mide** |  | **ta** |  | **GRAVE - III** |  | **MODERADO - II** |  | **LEVE - I** |
| **El día de la cirugía** |  | t=1 |  | 0.733 |  | 0.588 |  | 0.648 |
|  | t=2 |  | 0.690 |  | 0.566 |  | 0.619 |
| **1 día después de la cirugía** |  | t=1 |  | 0.794 |  | 0.706 |  | 0.664 |
|  | t=2 |  | 0.770 |  | 0.677 |  | 0.644 |
| **1 día después de la cirugía** |  | t=1 |  | 0.819 |  | 0.719 |  | 0.702 |
|  | t=2 |  | 0.771 |  | 0.650 |  | 0.689 |

a t es el intervalo de tiempo, en días, entre la medición del biomarcador y el diagnóstico clínico del episodio de IRA.

Tabla A.3. AUCs de las curvas ROC tiempo-dependientes (acumulada/dinámica) para el cambio en urea desde basal, en la muestra exploratoria.

| **El cambio en urea se mide** |  |  |  | **Tipo** | | | | |
| --- | --- | --- | --- | --- | --- | --- | --- | --- |
|  | **ta** |  | **GRAVE - III** |  | **MODERADO - II** |  | **LEVE - I** |
| **El día de la cirugía** |  | t=1 |  | 0.457 |  | 0.625 |  | 0.566 |
|  | t=2 |  | 0.390 |  | 0.546 |  | 0.548 |
| **1 día después de la cirugía** |  | t=1 |  | 0.592 |  | 0.748 |  | 0.550 |
|  | t=2 |  | 0.596 |  | 0.722 |  | 0.554 |
| **1 día después de la cirugía** |  | t=1 |  | 0.702 |  | 0.773 |  | 0.618 |
|  | t=2 |  | 0.681 |  | 0.743 |  | 0.607 |

a t es el intervalo de tiempo, en días, entre la medición del biomarcador y el diagnóstico clínico del episodio de IRA.

Tabla A.4. AUCs de las curvas ROC tiempo-dependientes (acumulada/dinámica) para el cambio en Crs desde basal, en la muestra exploratoria.

| **El cambio en Crs se mide** |  |  |  | **Tipo** | | | | |
| --- | --- | --- | --- | --- | --- | --- | --- | --- |
|  | **ta** |  | **GRAVE - III** |  | **MODERADO - II** |  | **LEVE - I** |
| **El día de la cirugía** |  | t=1 |  | 0.585 |  | 0.620 |  | 0.651 |
|  | t=2 |  | 0.513 |  | 0.532 |  | 0.478 |
| **1 día después de la cirugía** |  | t=1 |  | 0.692 |  | 0.780 |  | 0.559 |
|  | t=2 |  | 0.693 |  | 0.748 |  | 0.531 |
| **1 día después de la cirugía** |  | t=1 |  | 0.824 |  | 0.889 |  | 0.689 |
|  | t=2 |  | 0.798 |  | 0.829 |  | 0.638 |

a t es el intervalo de tiempo, en días, entre la medición del biomarcador y el diagnóstico clínico del episodio de IRA.
